# Supplementary material for: Sexual Difference Matters: Females with High Microsatellite Instability Show Increased Survival after Neoadjuvant Chemotherapy in Gastric Cancer
Source: MDPI journal article supplement (doi:10.3390/cancers13051048), 2021-03-02
Supplement: s1 [file s1]

# Sexual difference matters: females with high microsatellite instability show increased survival after neoadjuvant chemotherapy in gastric cancer

Meike Kohlruss, Katja Ott, Bianca Grosser, Moritz Jesinghaus, Julia Slotta-Huspenina, Alexander Novotny, Alexander Hapfelmeier, Thomas Schmidt, Matthias M. Gaida, Wilko Weichert and Gisela Keller

## Supplementary Methods

### MSI analysis using mononucleotide repeats

MSI analysis using the three mononucleotide repeats NR-21, NR-24, NR-27 was performed in a multiplex PCR with fluorescence-tagged primers using the Type-it Microsatellite PCR kit according to the instructions of the manufacturer (Qiagen, Hilden, Germany). Primer sequences were as published [30] and cycle conditions were as follows: after an initial step of 95°C for 5 min, 32 cycles were performed consisting of denaturation at 95°C for 30 sec, annealing at 58°C for 90 sec and extension at 72°C for 30 sec and final extension at 60°C for 30 min. Separation and detection of the PCR products were performed in a 3130 Genetic Analyzer (Applied Biosystems, Foster City, CA) as described previously [17].

**Table S1.** Chemotherapy regimens of the preoperatively treated patients stratified according to sex and age.

| Neoadjuvant Chemotherapy      | Female   |      | Male     |      | <55 years |      | ≥55 years |      |
|-------------------------------|----------|------|----------|------|-----------|------|-----------|------|
|                               | <i>n</i> | %    | <i>n</i> | %    | <i>n</i>  | %    | <i>n</i>  | %    |
| Total                         | 90       | 100  | 336      | 100  | 124       | 100  | 302       | 100  |
| Cis + 5-FU or Cap             | 49       | 54.5 | 164      | 48.8 | 65        | 52.4 | 148       | 49.1 |
| Ox + 5-FU or Cap              | 11       | 12.2 | 40       | 11.9 | 3         | 2.4  | 48        | 15.9 |
| Cis + 5-FU + Doc or Pac       | 5        | 5.6  | 24       | 7.1  | 16        | 12.9 | 13        | 4.3  |
| Ox + 5-FU + Doc               | 4        | 4.4  | 17       | 5.1  | 10        | 8.1  | 11        | 3.6  |
| Cis or Ox + 5-FU or Cap + Epi | 13       | 14.4 | 75       | 22.3 | 23        | 18.6 | 65        | 21.5 |
| Others                        | 7        | 7.8  | 16       | 4.8  | 7         | 5.6  | 16        | 5.3  |
| n/a                           | 1        | 1.1  | -        | -    | -         | -    | 1         | <1   |

CTx, neoadjuvant chemotherapy; Cis, cisplatin; Ox, oxaliplatin; 5-FU, 5-fluorouracil; Cap, capecitabine; Doc, docetaxel; Pac, paclitaxel; Epi, epirubicin; Others, combination of Cis/Ox with other agents or cross over between different treatment regimens; n/a, no data available.

**Table S2.** Subgroup analysis in male and female patients stratified according to age and histological subtypes.

| Age             |           | Intestinal Subtype<br><i>n</i> (%) | Non-Intestinal Subtype<br><i>n</i> (%) | <i>p</i> -Value <sup>1</sup> |
|-----------------|-----------|------------------------------------|----------------------------------------|------------------------------|
| Male patients   | <55 years | 67 (21.3)                          | 60 (28.0)                              | 0.074                        |
|                 | ≥55 years | 248 (78.7)                         | 154 (72.0)                             |                              |
|                 | Total     | 315 (100)                          | 214 (100)                              |                              |
| Female patients | <55 years | 14 (17.1)                          | 33 (31.1)                              | 0.027                        |
|                 | ≥55 years | 68 (82.9)                          | 73 (68.9)                              |                              |
|                 | Total     | 82 (100)                           | 106 (100)                              |                              |

<sup>1</sup>Chi-squared test.

**Table S3.** Survival data of the patient cohort and subgroups in association with age.

| Patient Cohort and Subgroups | Age     | No. | Events | Survival Probability (%) |       |       | Median Survival (months)<br>(95% CI) | HR<br>(95% CI) | <i>p</i> -Value <sup>1</sup> |
|------------------------------|---------|-----|--------|--------------------------|-------|-------|--------------------------------------|----------------|------------------------------|
|                              |         |     |        | 1 yr                     | 3 yrs | 5 yrs |                                      |                |                              |
| All tumor specimens          | <55 yrs | 174 | 84     | 82.7                     | 56.5  | 46.4  | 51.0                                 | 0.93           | 0.555                        |

|                                |         |     |     |      |      |      |                      |                     |       |
|--------------------------------|---------|-----|-----|------|------|------|----------------------|---------------------|-------|
|                                |         |     |     |      |      |      | (30.6–71.4)          | (0.73–1.19)         |       |
|                                | ≥55 yrs | 543 | 260 | 77.5 | 53.3 | 47.0 | 46.3<br>(30.4–62.2)  | 1 ref.              | -     |
|                                | Total   | 717 | 344 | 78.8 | 54.0 | 46.8 | 46.3<br>(33.1–59.5)  | -                   | -     |
| Tumors with neoadjuvant CTx    | <55 yrs | 124 | 67  | 80.5 | 50.4 | 42.0 | 38.0<br>(21.0–55.1)  | 1.0<br>(0.75–1.34)  | 0.988 |
|                                | ≥55 yrs | 302 | 155 | 77.2 | 49.5 | 42.0 | 35.6<br>(24.6–46.6)  | 1 ref.              | -     |
|                                | Total   | 426 | 222 | 78.1 | 49.7 | 42.0 | 35.9<br>(27.2–44.6)  | -                   | -     |
| Tumors without neoadjuvant CTx | <55 yrs | 50  | 17  | 88.6 | 71.8 | 57.7 | nr                   | 0.66<br>(0.39–1.10) | 0.106 |
|                                | ≥55 yrs | 241 | 105 | 77.9 | 58.3 | 53.5 | 77.3<br>(43.1–111.5) | 1 ref.              | -     |
|                                | Total   | 291 | 122 | 79.7 | 60.5 | 54.0 | 85.0<br>(51.7–118.3) | -                   | -     |

HR, Hazard ratio; CI, confidence interval; ref., reference; nr, not reached; <sup>1</sup>Cox-regression.

**Table S4.** Response to neoadjuvant CTx regarding the sex specific MSI-H and MSS/EBV(–) groups.

| Category                    | Value                               | Male, MSS/EBV(–) | Male, MSI-H  | Female, MSS/EBV(–) | Female, MSI-H | <i>p</i> -Value <sup>1</sup> |
|-----------------------------|-------------------------------------|------------------|--------------|--------------------|---------------|------------------------------|
|                             |                                     | <i>n</i> (%)     | <i>n</i> (%) | <i>n</i> (%)       | <i>n</i> (%)  |                              |
| Response to neoadjuvant CTx | Responder (TRG1)                    | 24 (8.8)         | 2 (8.3)      | 9 (11.5)           | 2 (25)        | 0.330                        |
|                             | Non-responder <sup>2</sup> (TRG2/3) | 250 (91.2)       | 22 (91.7)    | 69 (88.5)          | 6 (75)        |                              |
| Total                       |                                     | 274 (100)        | 24 (100)     | 78 (100)           | 8 (100)       |                              |

TRG, tumor regression grade; CTx, chemotherapy; <sup>1</sup>Fisher's exact test; <sup>2</sup>Two patients with tumor progression during CTx were not operated and classified as TRG3 and as non-responders respectively.

**Table S5.** Multivariable analysis of survival including the interaction of sex and MSI status and pre- and posttherapeutically available clinical factors in all MSI-H and MSS/EBV(–) patients (n=653).

|                                                    | HR     | 95% CI    | <i>p</i> -Value <sup>1</sup> |
|----------------------------------------------------|--------|-----------|------------------------------|
| All patients: Pretherapeutic factors <sup>2</sup>  |        |           |                              |
| Clinical tumor stage                               |        |           |                              |
| cT2                                                | 1 ref. | -         | <0.001                       |
| cT3/4                                              | 2.60   | 1.86-3.65 |                              |
| MSI status                                         |        |           |                              |
| MSS/EBV(-)                                         | 1 ref. | -         | 0.011                        |
| MSI-H                                              | 0.58   | 0.38-0.88 |                              |
| All patients: Posttherapeutic factors <sup>3</sup> |        |           |                              |
| (y)pN <sup>4</sup>                                 |        |           |                              |
| (y)pN0                                             | 1 ref. | -         | <0.001                       |
| (y)pN1                                             | 2.40   | 1.77-3.25 |                              |
| Metastasis status                                  |        |           |                              |
| Negative                                           | 1 ref. | -         | <0.001                       |
| Positive                                           | 1.87   | 1.43-2.45 |                              |
| R-category                                         |        |           |                              |
| R0                                                 | 1 ref. | -         | <0.001                       |
| R1                                                 | 1.64   | 1.26-2.13 |                              |
| Localization                                       |        |           |                              |
| Proximal                                           | 1 ref. | -         | 0.006                        |
| Non-proximal                                       | 0.72   | 0.58-0.91 |                              |
| (y)pT <sup>4</sup>                                 |        |           |                              |
| (y)pT0                                             | 0.20   | 0.03-1.46 | 0.010                        |
| (y)pT1                                             | 0.40   | 0.20-0.77 | 0.113                        |
| (y)pT2                                             | 0.56   | 0.36-0.87 | 0.006                        |
|                                                    |        |           | 0.010                        |

|        |        |           |       |
|--------|--------|-----------|-------|
| (y)pT3 | 0.74   | 0.56-0.97 | 0.028 |
| (y)pT4 | 1 ref. | -         | -     |

ref., reference; MSS, microsatellite stable; EBV(-), Epstein-Barr virus negative; MSI-H, high microsatellite instability, HR; Hazard ratio; CI, confidence interval. <sup>1</sup> Wald-Test of Hazard Ratio; <sup>2</sup> Pre-therapeutic factors include: Sex, age ( $\geq 55$  vs  $< 55$  yrs), localization (proximal vs non-proximal), Laurén subtypes (intestinal vs non-intestinal), neoadjuvant chemotherapy (yes vs no), clinical tumor stage (cT2 vs cT3/4), MSI status (MSS/EBV(-) vs MSI-H), interaction (sex and MSI status); <sup>3</sup> Post-therapeutic factors included: Sex, age ( $\geq 55$  vs  $< 55$  yrs), localization (proximal vs non-proximal), Laurén subtypes (intestinal vs non-intestinal), neoadjuvant chemotherapy (yes vs no), (y)pT (pT1-pT4), (y)pN, M-category, R-category, MSI status (MSS/EBV(-) vs MSI-H), interaction (sex and MSI status); <sup>4</sup> TNM classification according to 7th Edition UICC.

**Table S6.** Multivariable analysis of survival including the interaction of sex and MSI status and pre- and posttherapeutically available clinical factors in MSI-H and MSS/EBV(-) patients treated with neoadjuvant CTx ( $n = 384$ ).

|                                                           | HR     | 95% CI    | <i>p</i> -Value <sup>1</sup> |
|-----------------------------------------------------------|--------|-----------|------------------------------|
| <b>CTx patients: Pretherapeutic factors <sup>2</sup></b>  |        |           |                              |
| Interaction (Sex and MSI status)                          | 0.14   | 0.02-1.01 | 0.051                        |
| <b>CTx patients: Posttherapeutic factors <sup>3</sup></b> |        |           |                              |
| R-category                                                |        |           |                              |
| R0                                                        | 1 ref. | -         | 0.001                        |
| R1                                                        | 1.71   | 1.23-2.37 |                              |
| ypN <sup>4</sup>                                          |        |           |                              |
| ypN0                                                      | 1 ref. | -         | <0.001                       |
| ypN1                                                      | 2.42   | 1.68-3.50 |                              |
| Metastasis status                                         |        |           |                              |
| Negative                                                  | 1 ref. | -         | <0.001                       |
| Positive                                                  | 1.73   | 1.27-2.35 |                              |
| ypT <sup>4</sup>                                          |        |           | 0.019                        |
| ypT0                                                      | 0.17   | 0.02-1.25 | 0.082                        |
| ypT1                                                      | 0.32   | 0.11-0.90 | 0.031                        |
| ypT2                                                      | 0.54   | 0.30-0.99 | 0.047                        |
| ypT3                                                      | 0.64   | 0.46-0.89 | 0.008                        |
| ypT4                                                      | 1 ref. | -         | -                            |
| Interaction (Sex and MSI status)                          | 0.16   | 0.02-1.14 | 0.067                        |

ref., reference; MSS, microsatellite stable; EBV(-), Epstein-Barr virus negative; MSI-H, high microsatellite instability, HR; Hazard ratio; CI, confidence interval. <sup>1</sup> Wald-Test of Hazard Ratio; <sup>2</sup> Pre-therapeutic factors include: Sex, age ( $\geq 55$  vs  $< 55$  yrs), localization (proximal vs non-proximal), Laurén subtypes (intestinal vs non-intestinal), clinical tumor stage (cT2 vs cT3/4), MSI status (MSS/EBV(-) vs MSI-H), interaction (sex and MSI status); <sup>3</sup> Post-therapeutic factors included: Sex, age ( $\geq 55$  vs  $< 55$  yrs), localization (proximal vs non-proximal), Laurén subtypes (intestinal vs non-intestinal), (y)pT (pT1-pT4), (y)pN, M-category, R-category, MSI status (MSS/EBV(-) vs MSI-H), interaction (sex and MSI status); <sup>4</sup> TNM classification according to 7th Edition UICC.

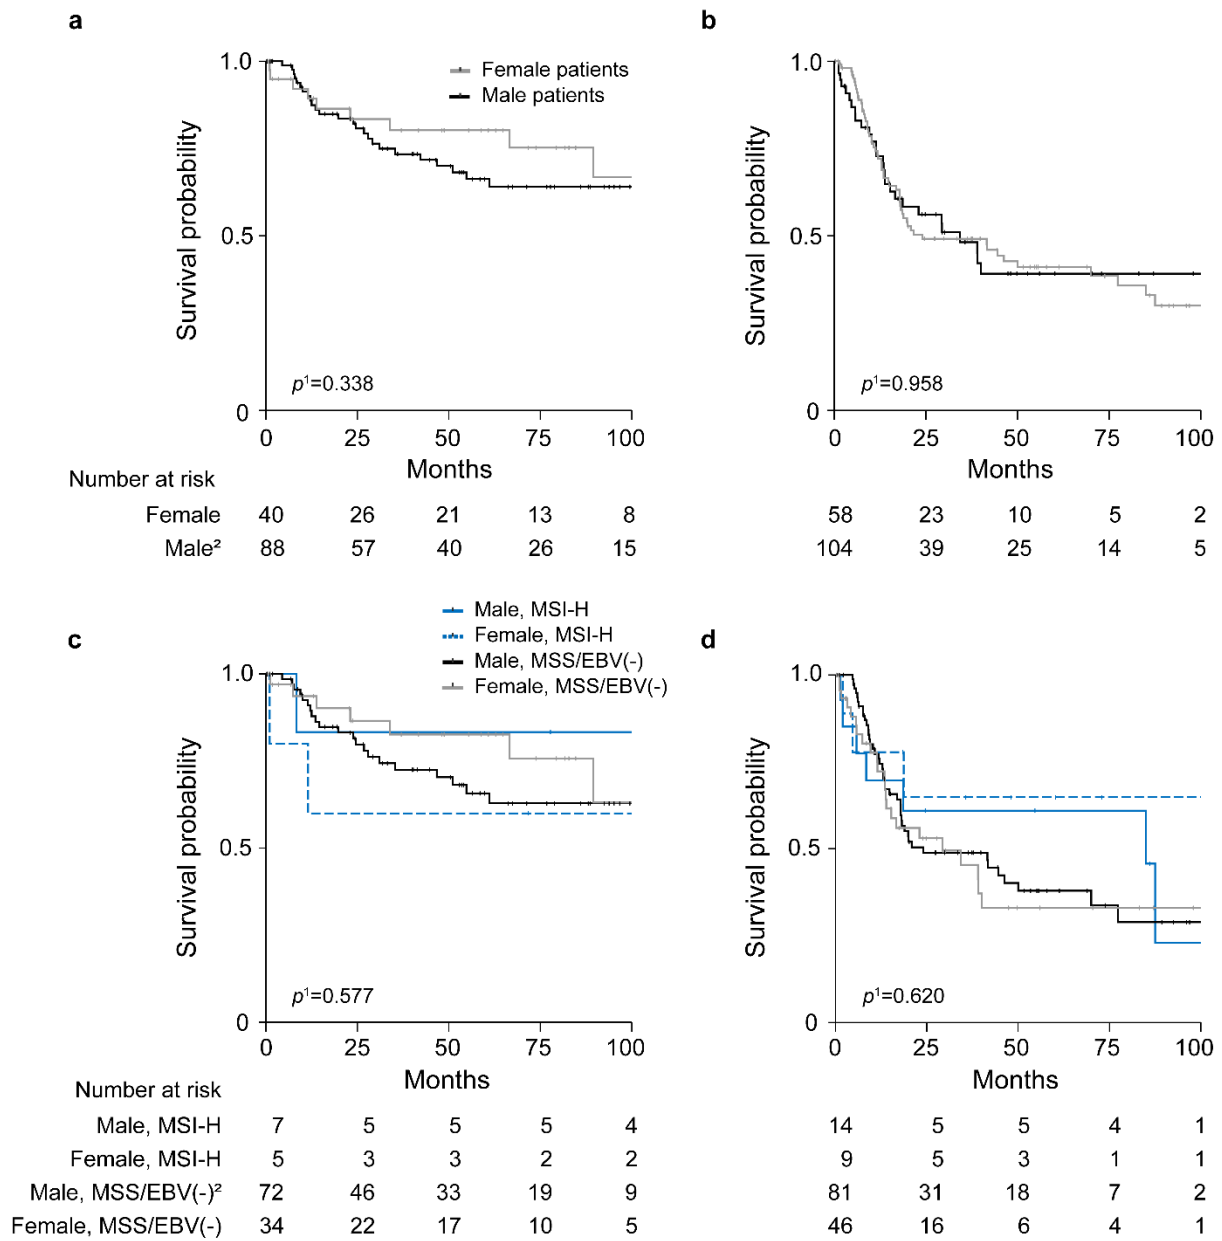

**Figure S1.** Patients' survival in the non-CTx group stratified according to clinical tumor stage. Kaplan-Meier curves of patients treated with surgery alone stratified according to the clinical tumor stage (cT) and discrimination by sex in cT2 (a) and cT3/cT4 (b) patients and by sex and MSI status in cT2 (c) and cT3/cT4 (d) patients are shown. <sup>1</sup> Cox-regression; <sup>2</sup> For one male patient with a MSS/EBV(-) tumor no cT data were available.

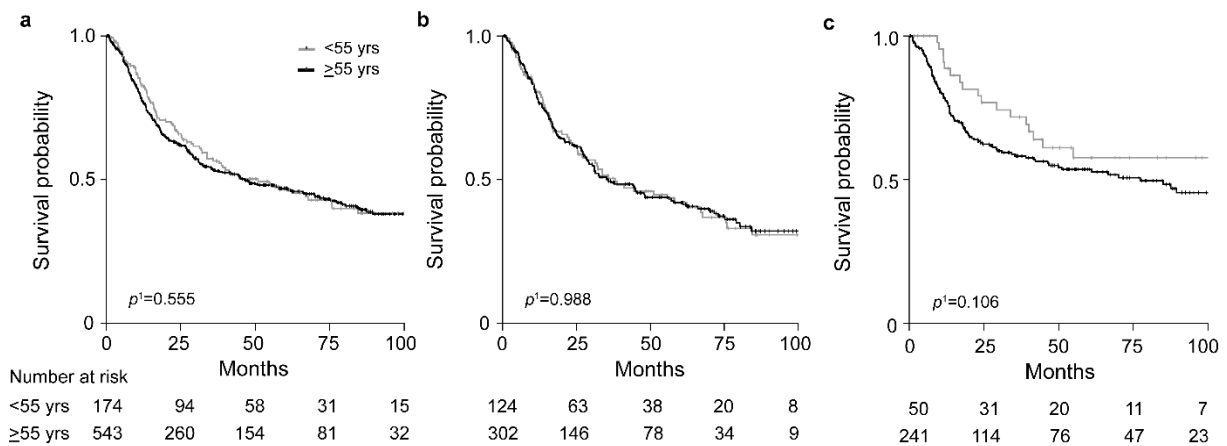

**Figure S2.** Discrimination of patients' survival by age. Kaplan-Meier curves of younger (<55 yrs) and older ( $\geq 55$  yrs) patients are shown. All patients (a), patients treated with neoadjuvant CTx (b) and patients treated with surgery alone (c). <sup>1</sup> Cox-regression.

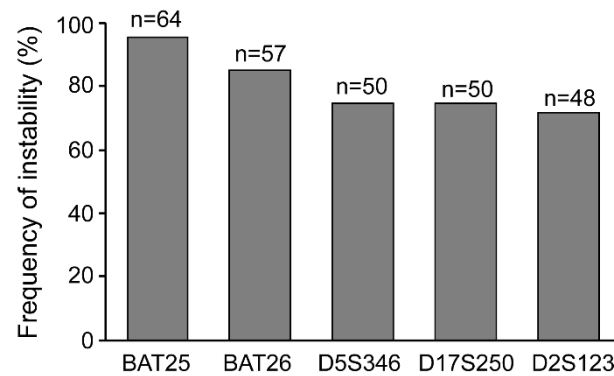

**Figure S3.** Frequency of instabilities at five microsatellite markers included in the Bethesda panel in MSI-H tumors ( $n = 67$ ).

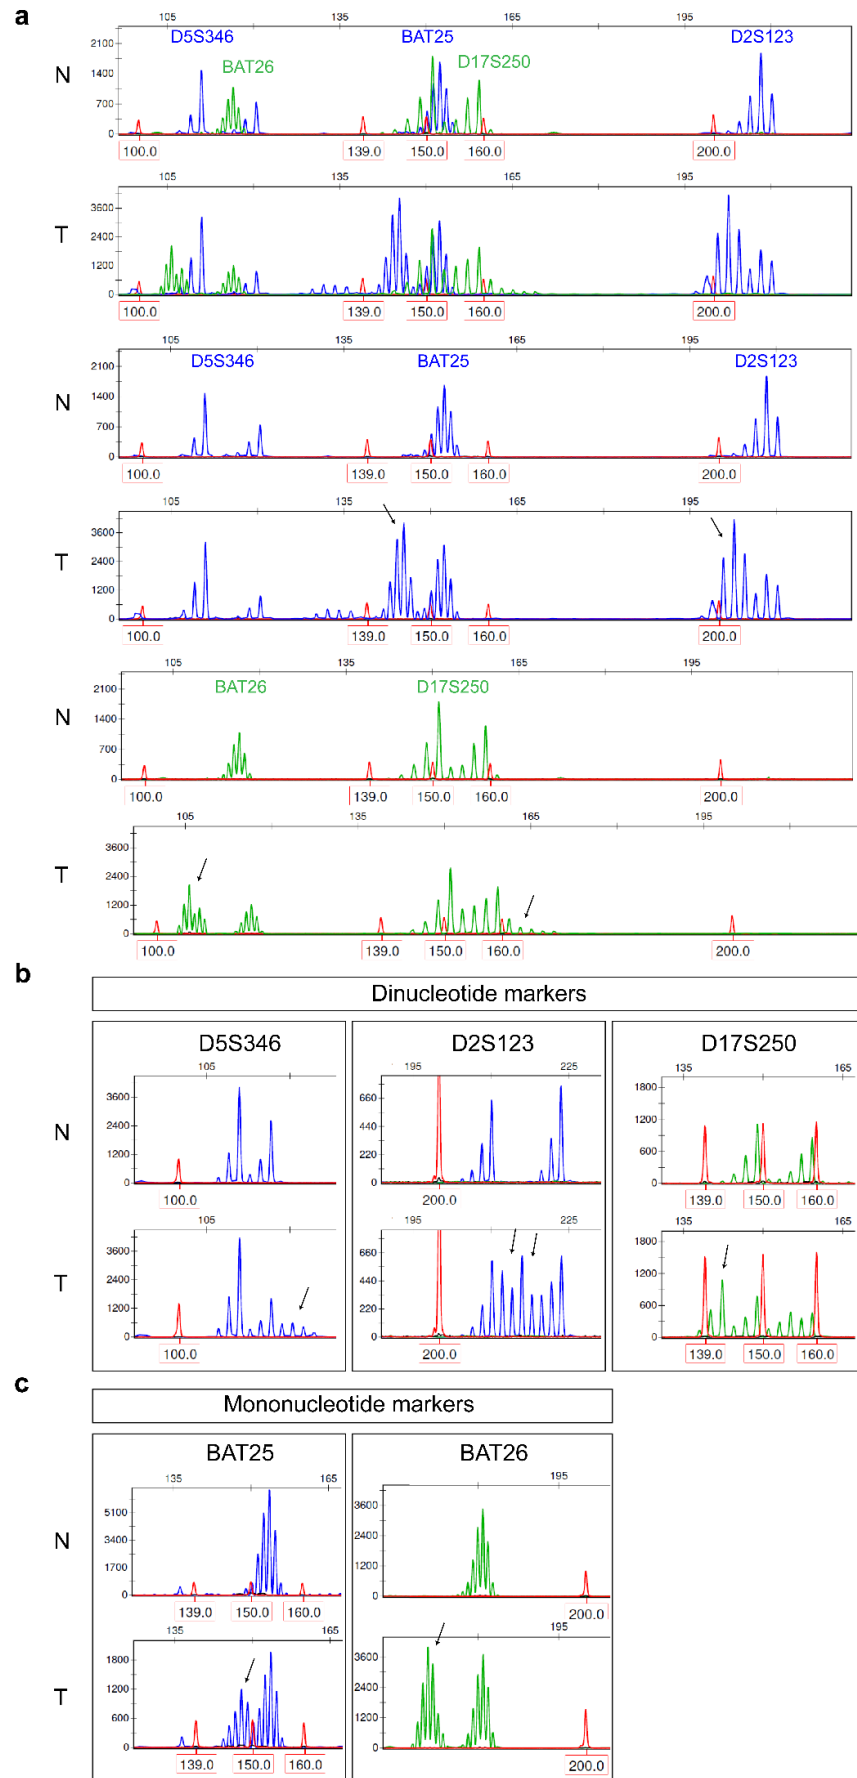

**Figure S4.** Capillary electrophoresis results of MSI analysis using the five microsatellite markers included in the Bethesda panel. Microsatellite patterns at three dinucleotide (D5S346, D17S250, D2S123) and two mononucleotide (BAT25, BAT26) repeat markers are shown exemplarily for the multiplex PCR of a tumor specimen (T) and its corresponding non-tumorous

tissue (N). Multiple additional alleles and distinct shifts occur at analyzed microsatellite loci in the tumor sample in comparison to the normal tissue as indicated with arrows. The upper two panels show an overview about an electropherogram of all five markers. To clearly show the instabilities, the FAM (blue) and HEX (green) fluorescence-tagged fragments are shown separately in the respective panels below **(a)**. Examples of MSI patterns from different tumor specimens and their corresponding non-tumorous tissues are shown for the dinucleotide markers **(b)** and the mononucleotide markers **(c)** respectively. The red peaks are internal size standards. The x-axis displays the size in bases and the y-axis the respective fluorescence intensity.
